# Supplementary material for: Tunable solid-state photoluminescence based on proton-triggered structural transformation of 4,4′-bipyridinium derivative
Source: Royal Society of Chemistry journal article supplement (doi:10.1039/c2tc00111j), 2012-11-07
Supplement: c2tc00111j.pdf [file c2tc00111j.pdf]

## Supporting Information

### Tunable solid-state photoluminescence based on proton-triggered structural transformation of 4,4'-bipyridinium derivative

Xue-Jun Zhou,<sup>ab</sup> Cheng Chen,<sup>a</sup> Cai-Xia Ren,<sup>ab</sup> Jian-Ke Sun<sup>a</sup> and Jie Zhang<sup>\*a</sup>

<sup>a</sup>State Key Laboratory of Structural Chemistry, Fujian Institute of Research on the Structure of Matter, Chinese Academy of Sciences, Fuzhou, Fujian 350002, People's Republic of China;

E-mail: [zhangjie@fjirsm.ac.cn](mailto:zhangjie@fjirsm.ac.cn)

<sup>b</sup>Graduate School of Chinese Academy of Sciences, Beijing, 100039, P. R. China

\*\*\*\*\*

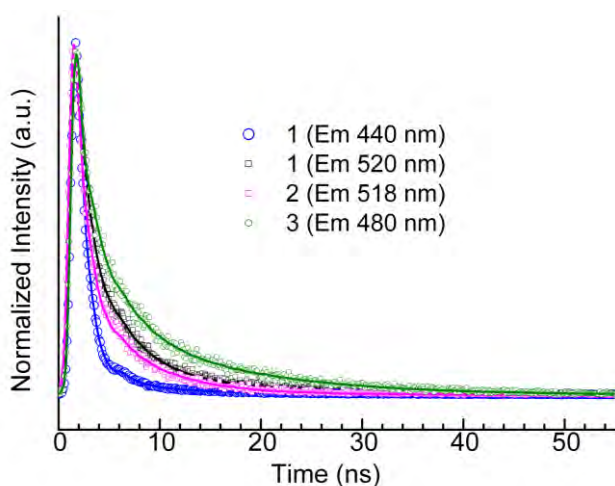

**Fig. S1** Luminescence decay curves for compounds 1-3 at ambient temperature. The solid lines are the best fits of experimental data based on the multiexponential functions ( $I = A + B_1e^{-t/\tau_1} + B_2e^{-t/\tau_2} + B_3e^{-t/\tau_3}$ ).

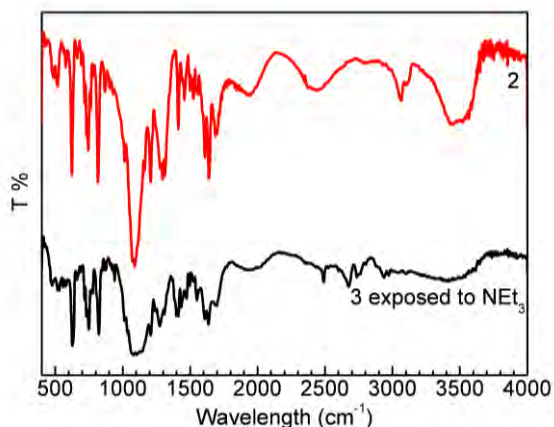

**Fig. S2** IR spectra show the structural transformation when crystal **3** is exposed to NEt<sub>3</sub> vapor.

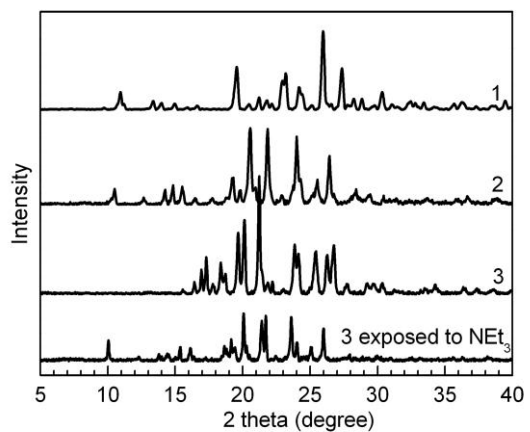

**Fig. S3** A comparison of the experimental PXRD patterns of the crystal **3** exposed to NEt<sub>3</sub> vapor with those of compounds **1-3**.
